# Supplementary material for: Neutrophil-to-Lymphocyte Ratio as an Independent Predictor of In-Hospital Mortality in Patients with Acute Intracerebral Hemorrhage
Source: MDPI journal article supplement (doi:10.3390/medicina57060622), 2021-06-15
Supplement: s1 [file s1]

**Supplementary Table S1. Demographic, Clinical and Imaging Characteristics of patients surviving at three days**

| Parameter (Unit)                                  | Alive at Discharge<br>(n = 76, 67.9%) | In-Hospital Death<br>(n = 36, 32.1%) | P      |
|---------------------------------------------------|---------------------------------------|--------------------------------------|--------|
| Age (years, median)                               | 66.5                                  | 75                                   | 0.01   |
| Gender (n,% male)                                 | 45 (59.21%)                           | 23 (63.89%)                          | 0.6    |
| Smokers (n, %)                                    | 14 (18.42%)                           | 9 (25%)                              | 0.5    |
| Chronic alcohol intake (n, %)                     | 23 (30.26%)                           | 10 (27.78%)                          | 0.7    |
| Medical History (n, column%)                      |                                       |                                      |        |
| Previous Ischemic Stroke                          | 3 (3.9%)                              | 2 (5.5%)                             | 0.7    |
| Previous Hemorrhagic Stroke                       | 11 (14.47%)                           | 5 (13.89%)                           | 0.9    |
| Previous Known Hypertension                       | 59 (78.67%)                           | 27 (77.14%)                          | 0.85   |
| Diabetes mellitus                                 | 18 (23.68%)                           | 17 (47.22%)                          | 0.01   |
| Dyslipidemia                                      | 59 (77.63%)                           | 20 (55.56%)                          | 0.01   |
| Atrial fibrillation                               | 8 (10.6%)                             | 5 (15.1%)                            | 0.5    |
| Coronary artery disease                           | 1 (1.32%)                             | 5 (13.89%)                           | 0.005  |
| Previous treatment (n, %)                         |                                       |                                      |        |
| Previous antiplatelet treatment                   | 21 (27.63%)                           | 8 (22.22%)                           | 0.5    |
| Previous anticoagulant treatment                  | 7 (9.21%)                             | 4 (11.11%)                           | 0.7    |
| Previous antihypertensive treatment               | 34 (47.22%)                           | 17 (53.13%)                          | 0.5    |
| Clinical ICH severity (median, 25-75 IQR)         |                                       |                                      |        |
| ICH score                                         | 1 (0-1)                               | 2 (1-3)                              | <0.001 |
| Admission NIHSS                                   | 12 (4-18)                             | 20 (10-26)                           | <0.001 |
| Admission GCS                                     | 15 (14-15)                            | 12 (8-15)                            | <0.001 |
| Pre-Stroke mRS                                    | 0 (0-0)                               | 0 (0-1)                              | 0.4    |
| ICH imaging                                       |                                       |                                      |        |
| Admission HV (ml, 25-75 IQR)                      | 11.5 (2.3-24.8)                       | 27.3 (11.8-59.6)                     | <0.001 |
| Lobar hemorrhage (n,%)                            | 18 (23.68%)                           | 12 (33.33%)                          | 0.2    |
| Deep hemorrhage(n,%)                              | 56 (73.68%)                           | 23 (63.89%)                          | 0.2    |
| Ventricular effraction (n, %)                     | 26 (34.21%)                           | 22 (61.11%)                          | 0.007  |
| Admission GRAEB score (median, 25-75 IQR)         | 0 (0-1)                               | 1.5 (0-6)                            | 0.004  |
| Admission Blood-Analyses                          |                                       |                                      |        |
| Creatinine Clearance (ml/min/1.73m <sup>2</sup> ) | 82.3 (59.1-94.9)                      | 73.2 (52.7-93.3)                     | 0.3    |
| Glucose mg/dl (median, 25-75 IQR)                 | 137 (105-162)                         | 176.5 (137-207)                      | <0.001 |
| Glucose > 180 mg/dl (n,%)                         | 12 (15.79%)                           | 16 (44.44%)                          | 0.001  |
| WBC (cells/mm <sup>3</sup> )                      | 9860 (7547-11845)                     | 12545 (9865-15195)                   | 0.001  |
| NEUT (cells/mm <sup>3</sup> )                     | 6925 (4900-9475)                      | 9750 (6825-12500)                    | <0.001 |
| LYMPHs (cells/mm <sup>3</sup> )                   | 1500 (1100-2200)                      | 1500 (1200-2275)                     | 0.9    |
| MONOs (cells/mm <sup>3</sup> )                    | 600 (400-800)                         | 664 (500-900)                        | 0.2    |
| HGB g/dl (median, 25-75 IQR)                      | 13.8 (12.6 – 15.3)                    | 13.3 (12.4 – 14.7)                   | 0.3    |
| PLTs (cells/mm <sup>2</sup> )                     | 197000 (156500-250750)                | 206000 (150000-272000)               | 0.7    |
| INR (median, 25-75 IQR)                           | 1.1 (1.04 – 1.2)                      | 1.1 (1.06 – 1.3)                     | 0.1    |
| Admission NLR (median, 25-75 IQR)                 | 4.4 (2.4-7.6)                         | 6.5 (3.6-11.3)                       | 0.002  |
| 3-day NLR (median, 25-75 IQR)                     | 4.6 (3.3-6.2) 76p                     | 9.9 (6.5-15.5)                       | <0.001 |
